# Supplementary material
Source: publisher figshare collection journal article supplement (https://acs.figshare.com/ndownloader/files/21975777)
Supplement: Supplementary file 1 [file 21975777]

Supporting Information for

**Visible-Light Photocatalytic Ozonation Using Graphitic-  
C<sub>3</sub>N<sub>4</sub> Catalysts: A Hydroxyl Radical Manufacturer for  
Wastewater Treatment**

*Jiadong Xiao,<sup>†,‡,§,||</sup> Yongbing Xie,<sup>†</sup> Jabor Rabeah,<sup>§</sup> Angelika Brückner<sup>\*,§</sup> and  
Hongbin Cao<sup>\*,†</sup>*

<sup>†</sup> Beijing Engineering Research Center of Process Pollution Control, Key Laboratory of Green Process and Engineering, Institute of Process Engineering, Chinese Academy of Sciences, Beijing 100190, China

<sup>‡</sup> School of Chemical Engineering, University of Chinese Academy of Sciences, Beijing 100049, China

<sup>§</sup> Department of Catalytic In Situ Studies, Leibniz-Institute for Catalysis e. V., Albert-Einstein-Straße 29a, D-18059 Rostock, Germany

Corresponding authors.

\* hbcao@ipe.ac.cn (H. Cao)

\* Angelika.Brueckner@catalysis.de (A. Brückner).

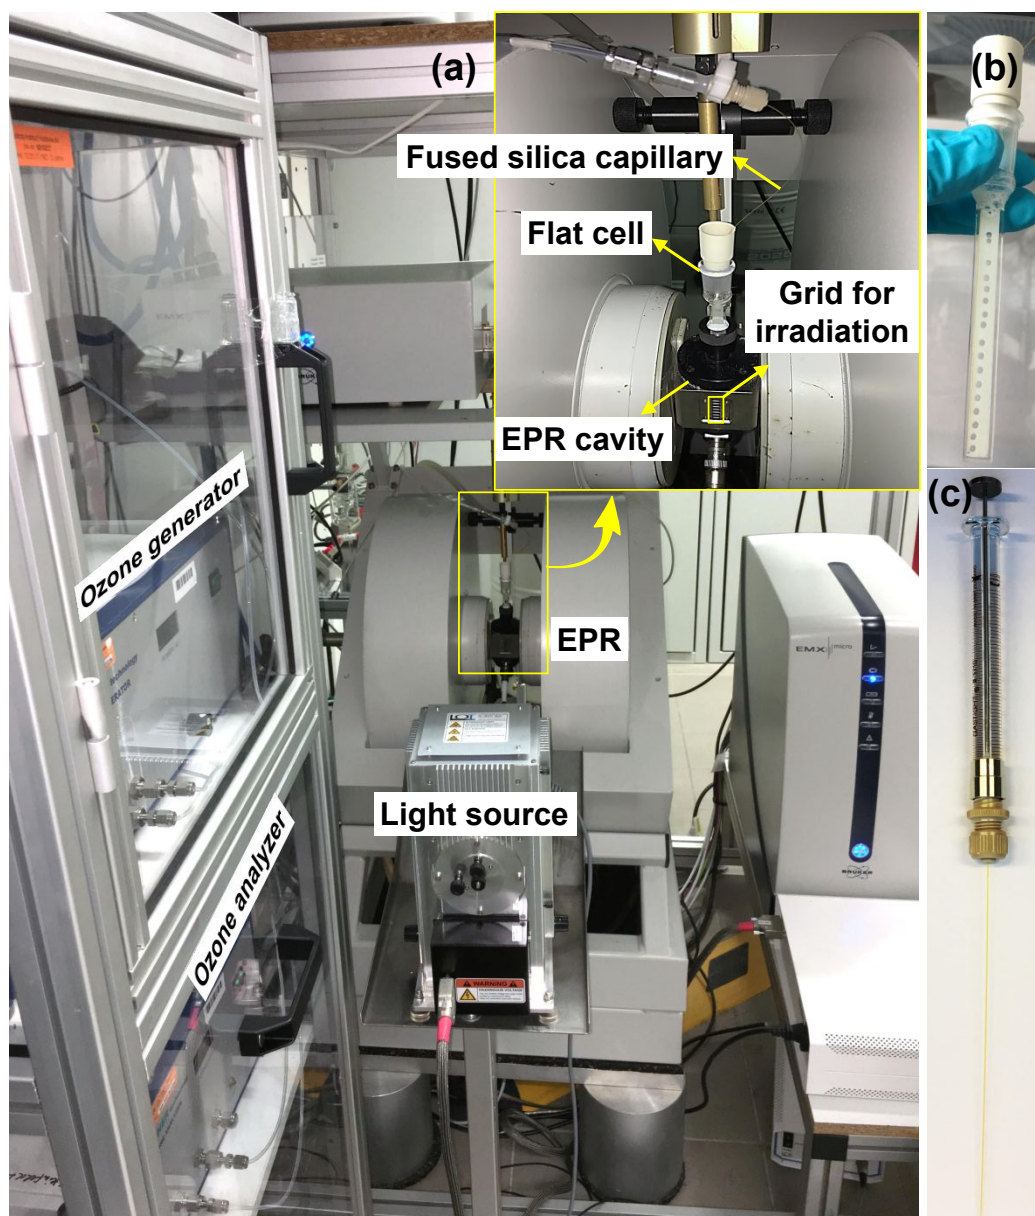

**Figure S1.** Photographs of (a) the *in-situ* EPR spectroscopic set-up, (b) flat cell loaded with bulk g-C<sub>3</sub>N<sub>4</sub> suspension under O<sub>3</sub> bubbling (0.5 mL/min) and (c) self-modified syringe. Full details about this EPR methodology are given in our previous publication.<sup>1</sup> Reproduced with permission from ref. 1. Copyright 2017 American Chemical Society.

## References

(1) Xiao, J. D.; Rabeah, J.; Yang, J.; Xie, Y. B.; Cao, H. B.; Brückner, A. Fast Electron Transfer and  $\cdot\text{OH}$  Formation: Key Features for High Activity in Visible-Light-Driven Ozonation with  $\text{C}_3\text{N}_4$  Catalysts. *ACS Catal.* **2017**, *7*, 6198-6206.
